# Supplementary material for: Assessing the cost of providing a prevention of mother-to-child transmission of HIV/AIDS service in Ethiopia: urban-rural health facilities setting
Source: BMC Health Serv Res. 2019 Mar 6;19:148. doi: 10.1186/s12913-019-3978-4 (PMC6404341; doi:10.1186/s12913-019-3978-4)
Supplement: Supplementary file 1 — Health center resource lists and computed average unit/ annual cost across the different inputs in Ethiopia (DOCX 23 kb) [file 12913_2019_3978_MOESM1_ESM.docx]

**Additional file 1:** Health center resource lists and computed average unit/ annual cost across the different inputs in Ethiopia

| Health Center resources | | Unit cost | |
| --- | --- | --- | --- |
| **1** | **Labor cost** | **Average salary  per day (ETB)** | **Average salary per day (USD)** |
|  | Nurse officer | 464.14 | 23.60 |
|  | Midwife | 140.69 | 7.15 |
|  | Midwife-advanced | 300.98 | 15.30 |
|  | Midwife-senior | 464.14 | 23.60 |
|  | Midwife | 140.69 | 7.15 |
|  | Midwife | 140.69 | 7.15 |
|  | Midwife-advanced | 300.98 | 15.30 |
|  | Mother Support Group | 41.67 | 2.12 |
|  | Mother Support Group | 41.67 | 2.12 |
|  | Mother Support Group | 41.67 | 2.12 |
| **2** | **Supplies** | **Cost  per unit (ETB)** | **Cost  per unit (USD)** |
|  | Disposable gloves | 66.68 | 3.39 |
|  | HIV testing kits: KHB | 576.35 | 29.30 |
|  | Lancet | 68.85 | 3.50 |
|  | HIV testing kits: Statpack | 666.83 | 33.90 |
|  | Alcohol | 69.04 | 3.51 |
|  | Cotton | 23.01 | 1.17 |
|  | Capillary tube | 179.00 | 9.10 |
|  | DBS kits | 1121.22 | 57.00 |
|  | Humidity | 961.89 | 48.90 |
|  | ART drug regimen: TDF + 3TC + EFV | 196.71 | 10.00 |
|  | NVP Prophylaxis (for the infants) | 38.36 | 1.95 |
|  | INH Prophylaxis | 64.72 | 3.29 |
|  | Panadol/ Paradox | 157.56 | 8.01 |
|  | Cotrimoxazole | 391.64 | 19.91 |
|  | Iron folate | 58.62 | 2.98 |
|  | Cotrimoxazole syrup (for the infants) | 8.85 | 0.45 |
| **3** | **Equipment** | **Annual cost (ETB)** | **Annual cost (USD)** |
|  | Blood pressure apparatus | 290.94 | 14.79 |
|  | Weighting scale (for Adult) | 813.46 | 41.35 |
|  | Length board | 338.45 | 17.21 |
|  | Table (2) | 1509.28 | 76.73 |
|  | Chairs (3) | 1358.35 | 69.06 |
|  | Examination bed (1) | 843.15 | 42.86 |
|  | Fetoscope | 243.44 | 12.38 |
|  | Meter | 11.88 | 0.60 |
|  | Weighting scale (for the infant) | 486.89 | 24.75 |
| **4** | **Medicines** | **Unit cost  per person (ETB)** | **Unit cost  per person (USD)** |
| **For the pregnant women** |
|  | ART drug regimen: TDF + 3TC + EFV | 2356.22 | 119.78 |
|  | INH Prophylaxis | 123.70 | 6.29 |
|  | Cotrimoxazole | 149.72 | 7.61 |
|  | Panadol/ Paradox | 100.39 | 5.10 |
|  | Iron folate | 5.60 | 0.28 |
|  | **For the infant** |  |  |
|  | NVP Prophylaxis (for the infants) | 40.73 | 2.07 |
|  | Cotrimoxazole syrup (for the infants) | 18.80 | 0.96 |
| **5** | **Transportation costs** | **Unit cost (ETB)** | **Unit cost (USD)** |
|  | Disposable gloves | 9.49 | 0.48 |
|  | HIV testing kits: KHB | 82.06 | 4.17 |
|  | Lancet | 9.80 | 0.50 |
|  | HIV testing kits: Statpack | 94.95 | 4.83 |
|  | Alcohol | 9.83 | 0.50 |
|  | Cotton | 3.28 | 0.17 |
|  | Capillary tube | 25.49 | 1.30 |
|  | DBS kits | 119.06 | 6.05 |
|  | Humidity | 102.14 | 5.19 |
|  | ART drug regimen: TDF + 3TC + EFV | 20.89 | 1.06 |
|  | INH Prophylaxis | 6.87 | 0.35 |
|  | Panadol/ Paradox | 16.73 | 0.85 |
|  | Cotrimoxazole | 41.59 | 2.11 |
|  | Iron folate | 6.22 | 0.32 |
|  | Cotrimoxazole syrup (for the infants) | 0.94 | 0.05 |
|  | NVP Prophylaxis (for the infants) | 4.07 | 0.21 |
| **6** | **Infrastructure costs** | **Unit cost per  day of operation (ETB)** | **Unit cost per  day of operation (USD)** |
|  | Health center (construction and maintenance costs) | 3844.74 | 195.46 |
|  | ANC/PMTCT | 411.94 | 20.94 |
|  | OPD | 411.94 | 20.94 |
|  | Delivery | 480.59 | 24.43 |
|  | ART | 480.59 | 24.43 |
|  | Emergency | 411.94 | 20.94 |
|  | Family Planning | 274.62 | 13.96 |
|  | EPI | 274.62 | 13.96 |
|  | IMNCH | 343.28 | 17.45 |
|  | VCT | 343.28 | 17.45 |
|  | TB | 411.94 | 20.94 |
| **7** | **Training costs** | **Annual cost (ETB)** | **Annual cost (USD)** |
|
|  | Training costs | 10500.00 | 533.79 |
| 8 | **Program management** | **Annual cost (ETB)** | **Annual cost (USD)** |
|  | Program management (M&E) cost | 16439.51 | 835.74 |
